# Supplementary material for: A Hypomorphic PALB2 Allele Gives Rise to an Unusual Form of FA-N Associated with Lymphoid Tumour Development
Source: PubMed Central journal article supplement (PMC4798644; doi:10.1371/journal.pgen.1005945), 2016-03-18

**Figure S4**

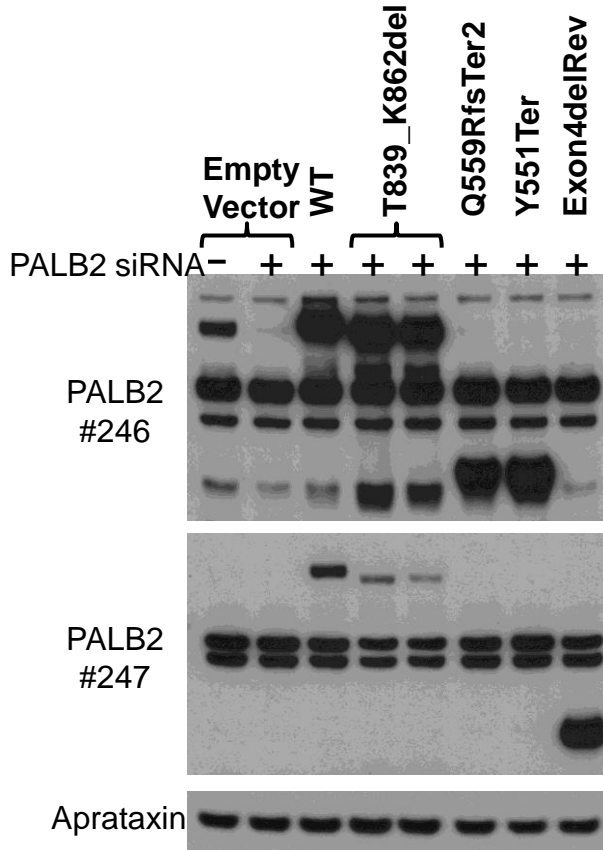

Supplement: pgen.1005945.s004.pdf [file pgen.1005945.s004.pdf]
